# Supplementary material
Source: Springer Nature journal article supplement (https://www.springerprofessional.de/resource/supplementary/13638_2013_991_MOESM3_ESM.pdf/11898964)
Supplement: MOESM3 [file 11898964]

|         |            |                                                                      |                                                              |          |
|---------|------------|----------------------------------------------------------------------|--------------------------------------------------------------|----------|
| Node ID | Time stamp | Time when first receives a hello packet from this neighbor ( $t_0$ ) | Number of hello packets received during the last $w$ seconds | position |
|---------|------------|----------------------------------------------------------------------|--------------------------------------------------------------|----------|
